# Supplementary material for: Phylogenomics Yields New Insight Into Relationships Within Vernonieae (Asteraceae)
Source: PubMed Central journal article supplement (PMC6843069; doi:10.3389/fpls.2019.01224), 2019-10-17
Supplement: Image_1.pdf [file Image_1.pdf]

## Supplementary Material

### 1.1 Supplementary Figures

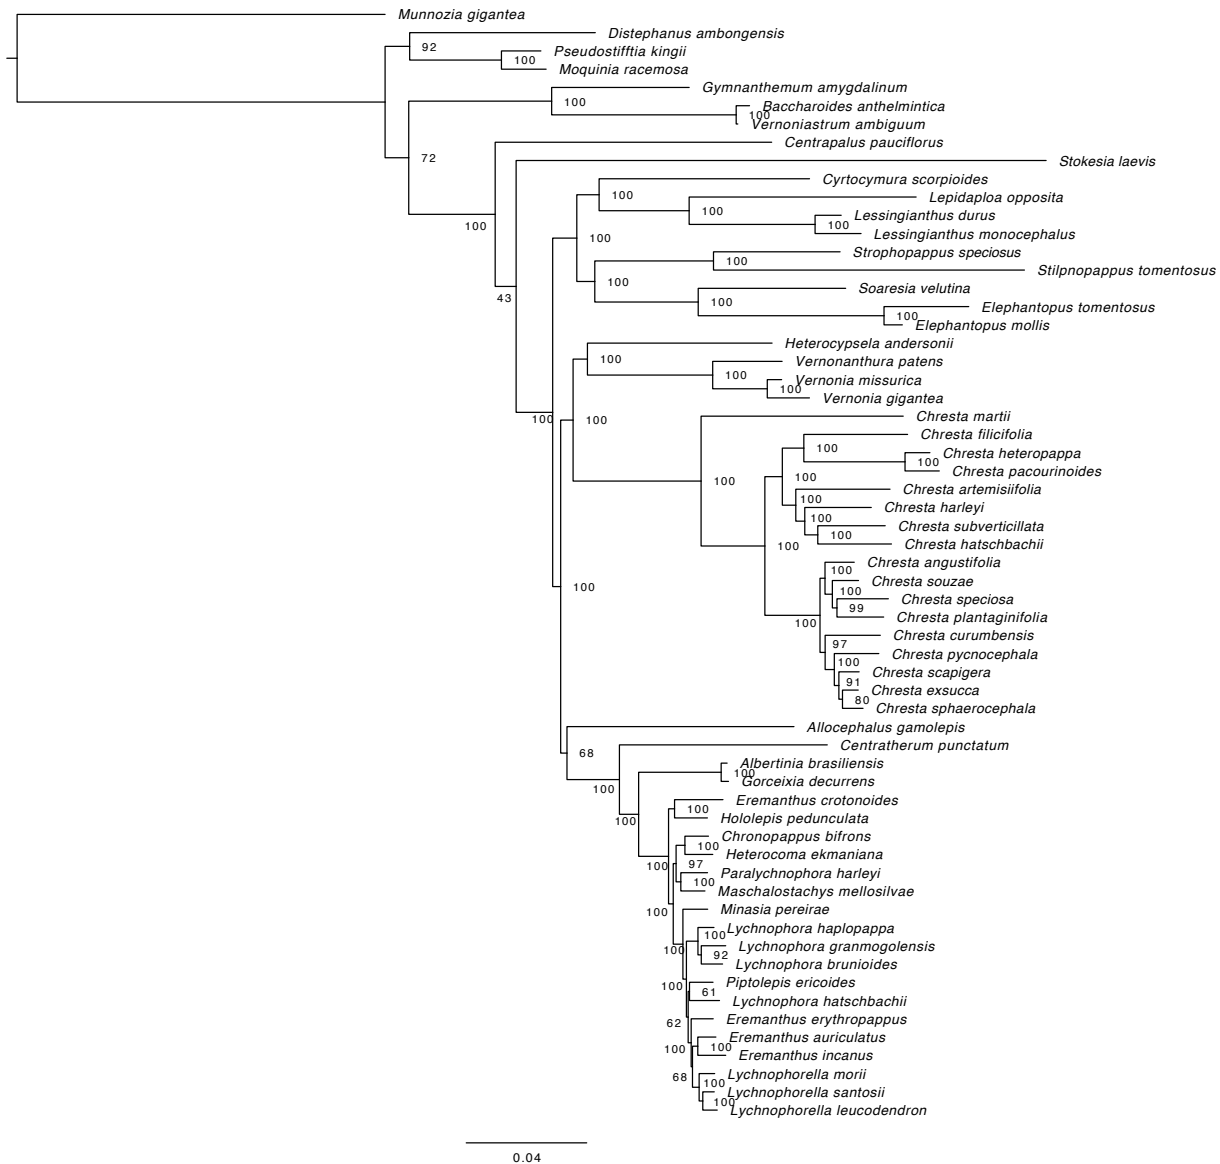

**Supplementary Figure 1.** Maximum likelihood tree obtained with the 75% matrix (113,347 characters), with model GTR+G+I, with 1000 bootstrap replicates. Node values are bootstrap values.

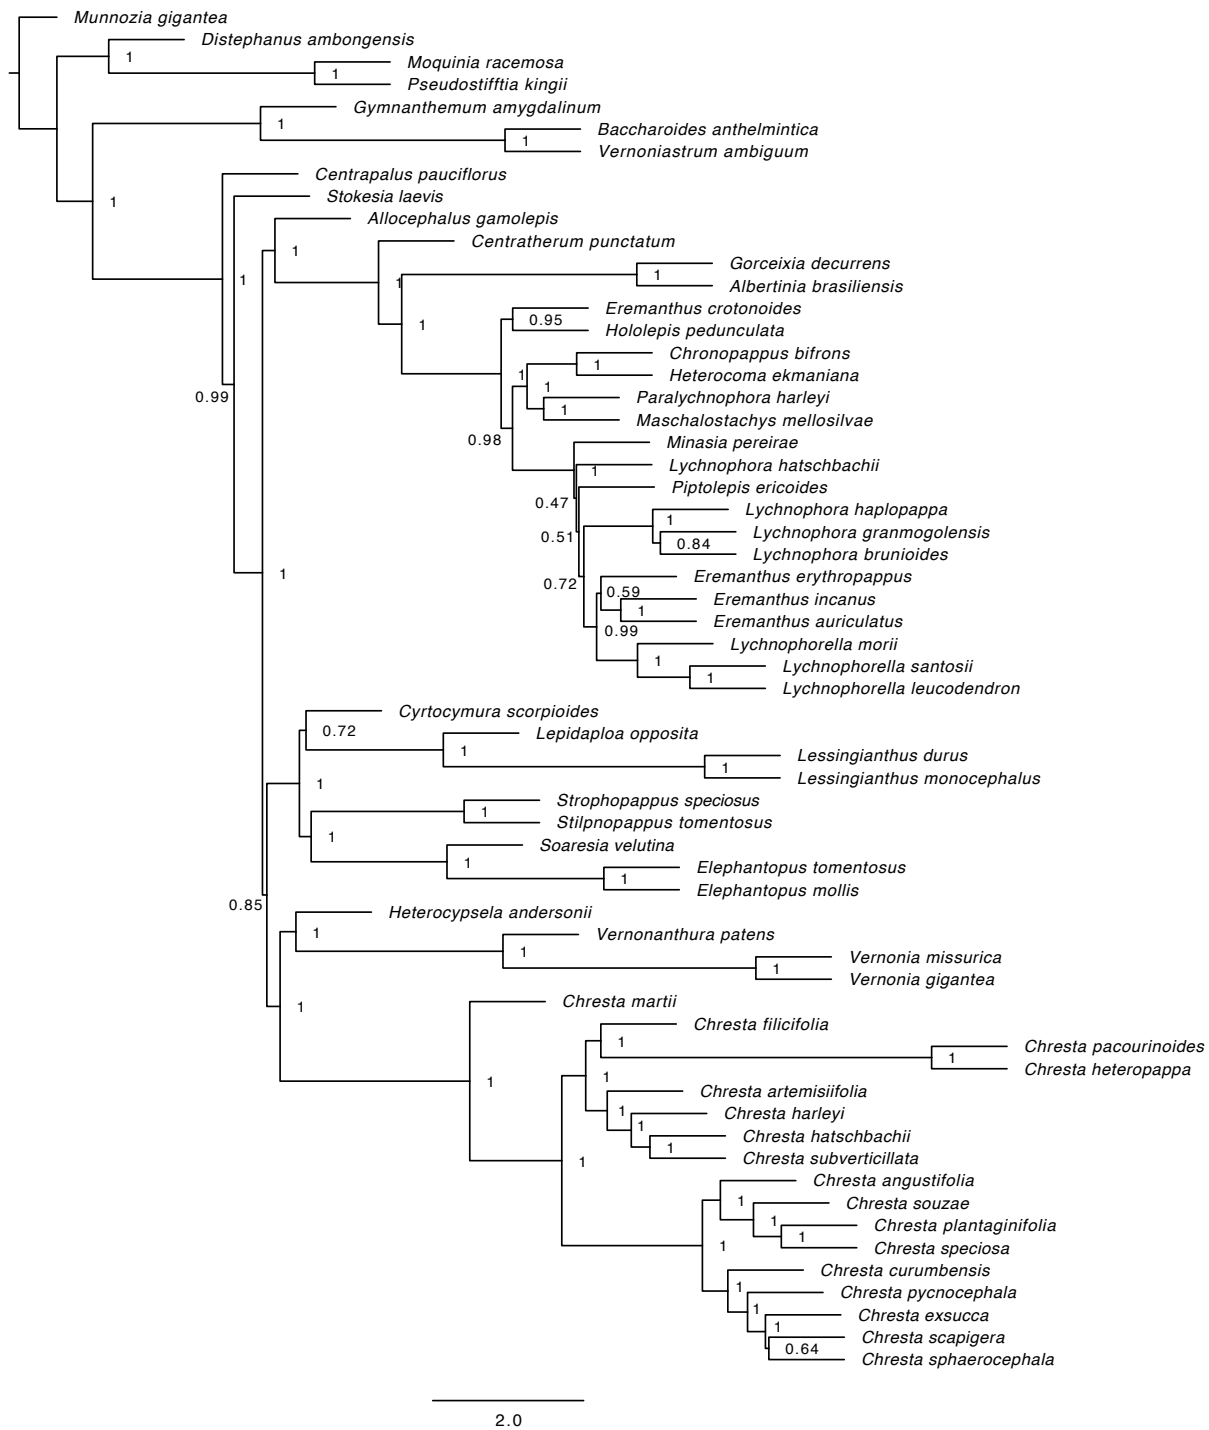

**Supplementary Figure 2.** Pseudocoalescence tree obtained with the total matrix (645 loci). Node values are local posterior probability.

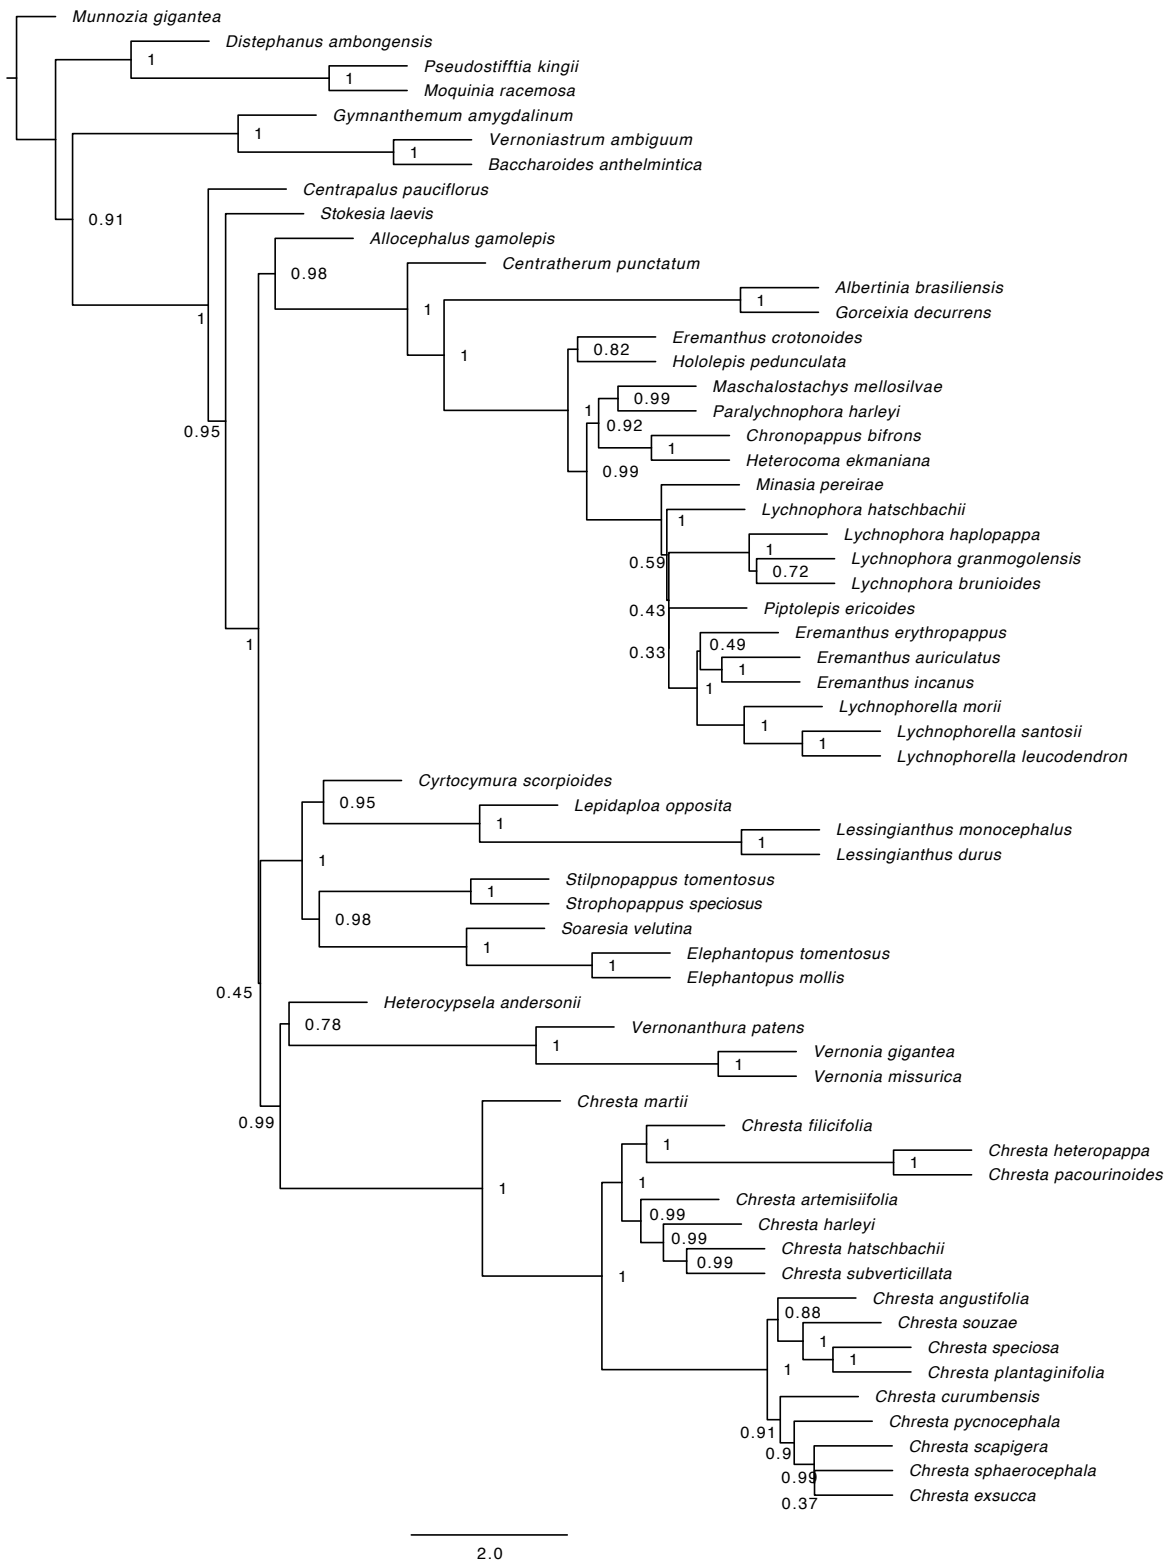

**Supplementary Figure 3.** Pseudocoalescence tree obtained with the 75% matrix (87 loci). Node values are local posterior probability.

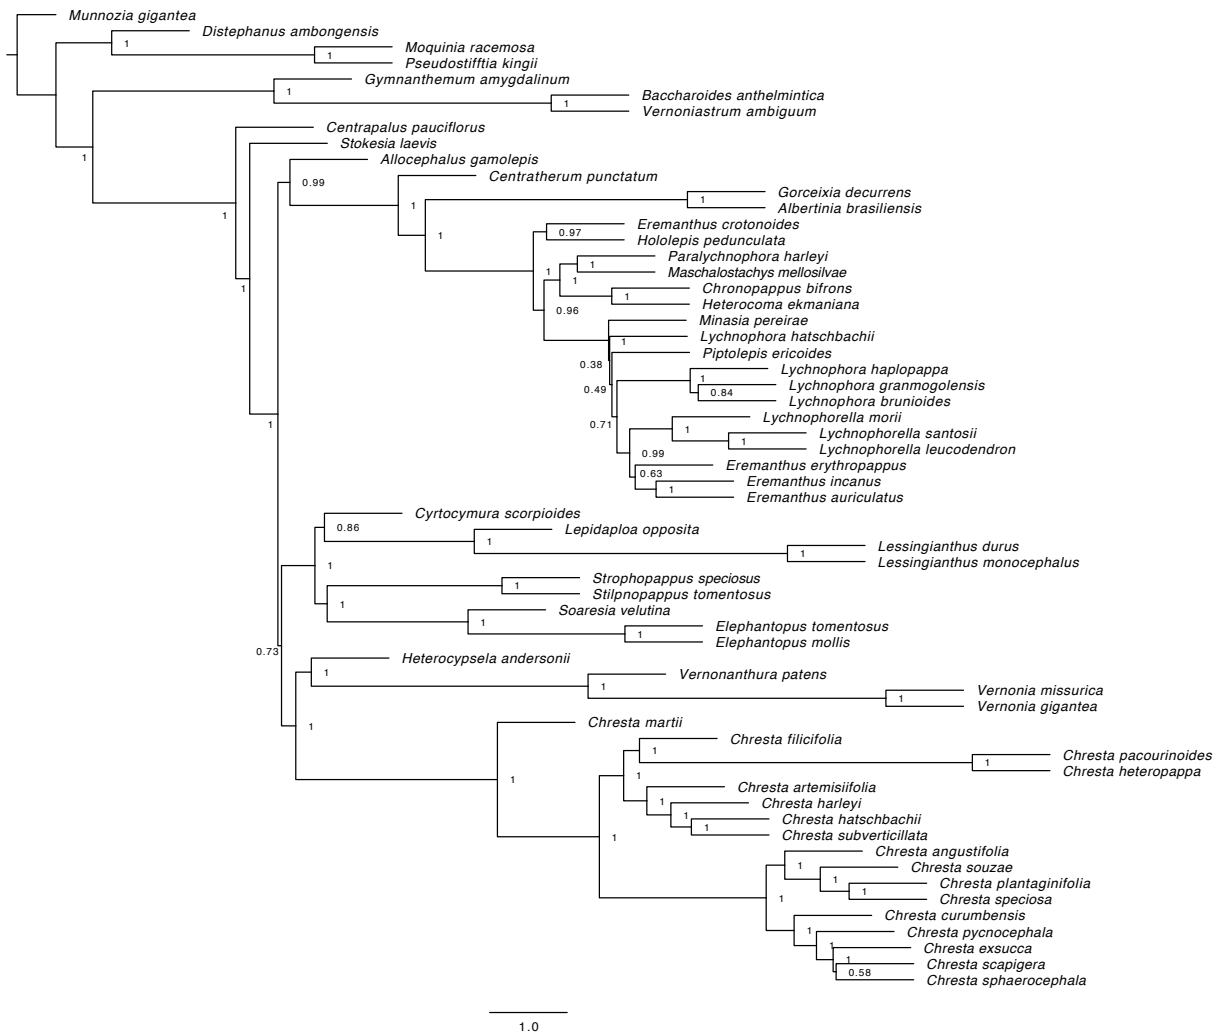

**Supplementary Figure 4.** Pseudocoalescence tree obtained with the total matrix after treatment of the genes tree with TreeShrink and removing taxa that could cause long-branch attraction. Node values are local posterior probability.

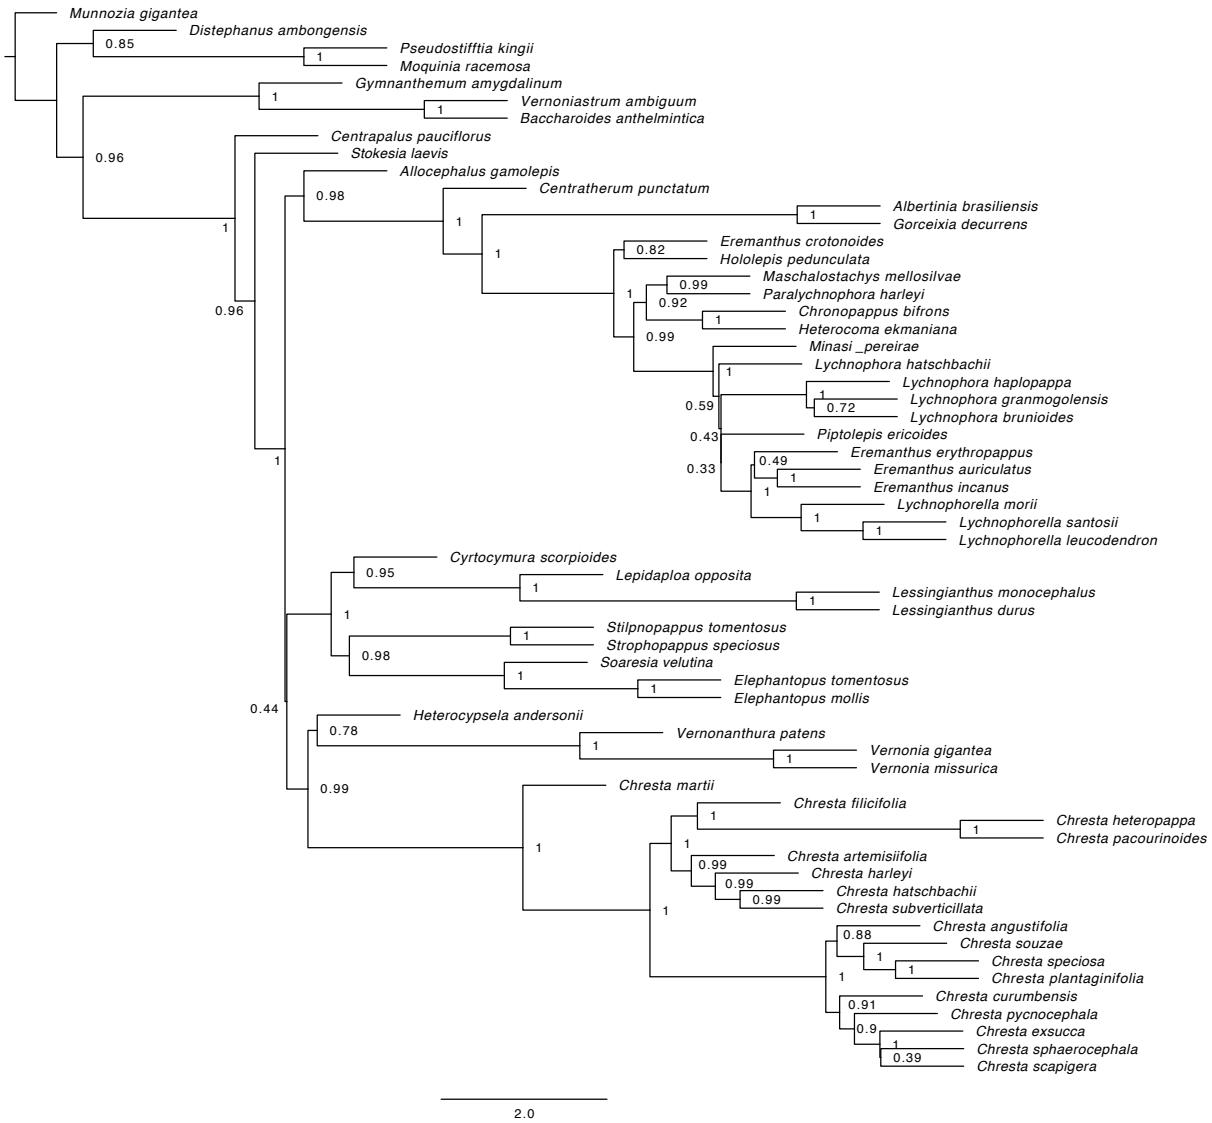

**Supplementary Figure 5.** Pseudocoalescence tree obtained with the 75% matrix after treatment of the genes tree with TreeShrink and removing taxa that could cause long-branch attraction. Node values are local posterior probability.
